# Supplementary material
Source: PubMed Central journal article supplement (PMC8994162)
Supplement: NIHMS1615595-supplement-1.pdf [file NIHMS1615595-supplement-1.pdf]

**Supplementary Table 1.** Demographic and Clinical Characteristics of Mild–Moderate and Severe Cases of PI-IBS

|                                                                 | Mild–Moderate<br>(n = 230) | Severe<br>(n = 50) | <i>P</i><br>value |
|-----------------------------------------------------------------|----------------------------|--------------------|-------------------|
| Female, n (%)                                                   | 144 (63)                   | 30 (60)            | .73               |
| Age at time of infection, y,<br>mean (SD)                       | 41.8 (15)                  | 46.4 (15)          | <b>.053</b>       |
| Caucasian, n (%)                                                | 217 (94)                   | 43 (86)            | <b>.038</b>       |
| Acute gastroenteritis reported<br>symptoms                      |                            |                    |                   |
| Diarrhea, n (%)                                                 | 229 (99.6)                 | 49 (98)            | .23               |
| Diarrhea duration, d,<br>means (SD)                             | 9.3 (6)                    | 8.2 (7)            | .34               |
| Diarrhea duration, n (%)                                        |                            |                    | .26               |
| <3 d or NA                                                      | 54 (24)                    | 17 (34)            |                   |
| 3–7 d                                                           | 94 (41)                    | 21 (42)            |                   |
| 8–14 d                                                          | 58 (25)                    | 7 (14)             |                   |
| >14 d                                                           | 24 (10)                    | 5 (10)             |                   |
| Number of stools/d,<br>means (SD)                               | 19.5 (18)                  | 18.9 (17)          | .82               |
| Bloody stools, n (%)                                            | 93 (41)                    | 20 (40)            | .94               |
| Abdominal cramps, n (%)                                         | 208 (92)                   | 45 (92)            | .96               |
| Vomiting, n (%)                                                 | 73 (32)                    | 17 (35)            | .76               |
| Fever, n (%)                                                    | 156 (68)                   | 30 (60)            | .25               |
| Chills, n (%)                                                   | 176 (79)                   | 39 (81)            | .68               |
| Headache, n (%)                                                 | 152 (68)                   | 33 (67)            | .95               |
| Muscle aches, n (%)                                             | 126 (57)                   | 29 (59)            | .73               |
| Joint pain, n (%)                                               | 78 (35)                    | 20 (42)            | .41               |
| <i>Campylobacter</i> species, n (%)                             |                            |                    | .32               |
| <i>C jejuni</i>                                                 | 191 (90.1)                 | 40 (85)            |                   |
| <i>C coli</i>                                                   | 21 (9.9)                   | 7 (15)             |                   |
| Quarter of specimen collection,<br>n (%)                        |                            |                    | .47               |
| January–March                                                   | 31 (14)                    | 11 (22)            |                   |
| April–June                                                      | 69 (30)                    | 12 (24)            |                   |
| July–September                                                  | 82 (36)                    | 17 (34)            |                   |
| October–December                                                | 48 (21)                    | 10 (20)            |                   |
| Hospitalized, n (%)                                             | 38 (17)                    | 11 (22)            | .36               |
| Antibiotic use, n (%)                                           | 176 (77)                   | 40 (80)            | .38               |
| Days between symptom<br>onset and antibiotic use,<br>means (SD) | 7.9 (7)                    | 6.9 (7)            | .48               |
| Time between symptom<br>onset and antibiotic use,<br>n (%)      |                            |                    | .42               |
| 0–2 d                                                           | 19 (8)                     | 7 (14)             |                   |
| 3–9 d                                                           | 97 (42)                    | 18 (36)            |                   |
| >9 d                                                            | 39 (17)                    | 8 (16)             |                   |
| Unknown use/onset                                               | 22 (10)                    | 8 (16)             |                   |
| No antibiotic use                                               | 53 (23)                    | 9 (18)             |                   |
| International travel before<br>onset, n (%)                     | 53 (23)                    | 12 (24)            | .89               |
| Contact with animals, n (%)                                     |                            |                    |                   |
| Dogs                                                            | 125 (61)                   | 31 (69)            | .32               |
| Cats                                                            | 65 (36)                    | 13 (35)            | .96               |
| Nonpoultry birds                                                | 7 (4.5)                    | 1 (3.1)            | .73               |
| Poultry                                                         | 16 (10)                    | 2 (67)             | .55               |

**Supplementary Table 1.** Continued

|                                         | Mild–Moderate<br>(n = 230) | Severe<br>(n = 50) | <i>P</i><br>value |
|-----------------------------------------|----------------------------|--------------------|-------------------|
| Pigs                                    | 6 (3.8)                    | 1 (3.2)            | .87               |
| Noncat/dog mammalian<br>pets            | 9 (6)                      | 0 (0.0)            | .18               |
| Reptiles/amphibians                     | 3 (1.9)                    | 1 (3.1)            | .66               |
| Ruminants                               | 21 (13)                    | 3 (9)              | .60               |
| Food consumed the week<br>before, n (%) |                            |                    |                   |
| Beef                                    | 120 (77)                   | 14 (56)            | <b>.023</b>       |
| Chicken                                 | 170 (79)                   | 33 (73)            | .37               |
| Turkey                                  | 32 (17)                    | 6 (16)             | .88               |
| Pork                                    | 98 (48)                    | 15 (35)            | .12               |
| Liver pate                              | 4 (2.5)                    | 0 (0.0)            | .38               |
| Well water                              | 55 (25)                    | 12 (27)            | .84               |
| Restaurant food                         | 179 (80)                   | 33 (69)            | .10               |

NOTE. Boldface indicates *P* < .05.

PI-IBS, postinfection irritable bowel syndrome.
